# Supplementary material
Source: publisher figshare collection journal article supplement (https://frontiersin.figshare.com/ndownloader/files/14512928)
Supplement: Supplementary file [file 14512928]

Supplementary Figure S1

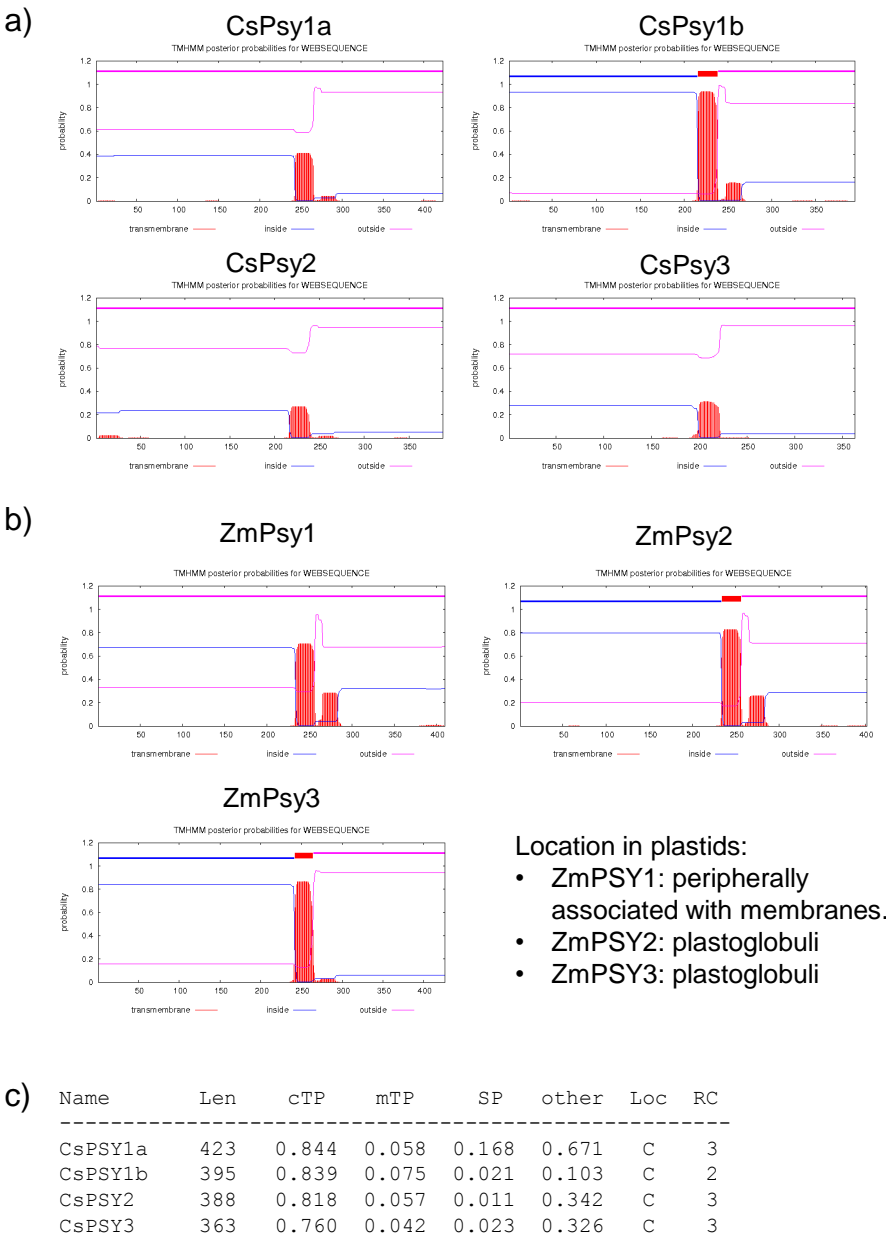

**Supplementary Figure S1.** (a) Putative hydrophobic profiles of different CsPSY enzymes, evaluated by the TMHMM Server v. 2.0. (b) Putative hydrophobic profiles of different ZmsPSY enzymes, evaluated by the TMHMM Server v. 2.0 and their location in plastids according to Shumskaya et al., 2012. (c) Prediction of the subcellular location of CsPSY proteins using the TargetP 1.1 Server.

Supplementary Figure S2

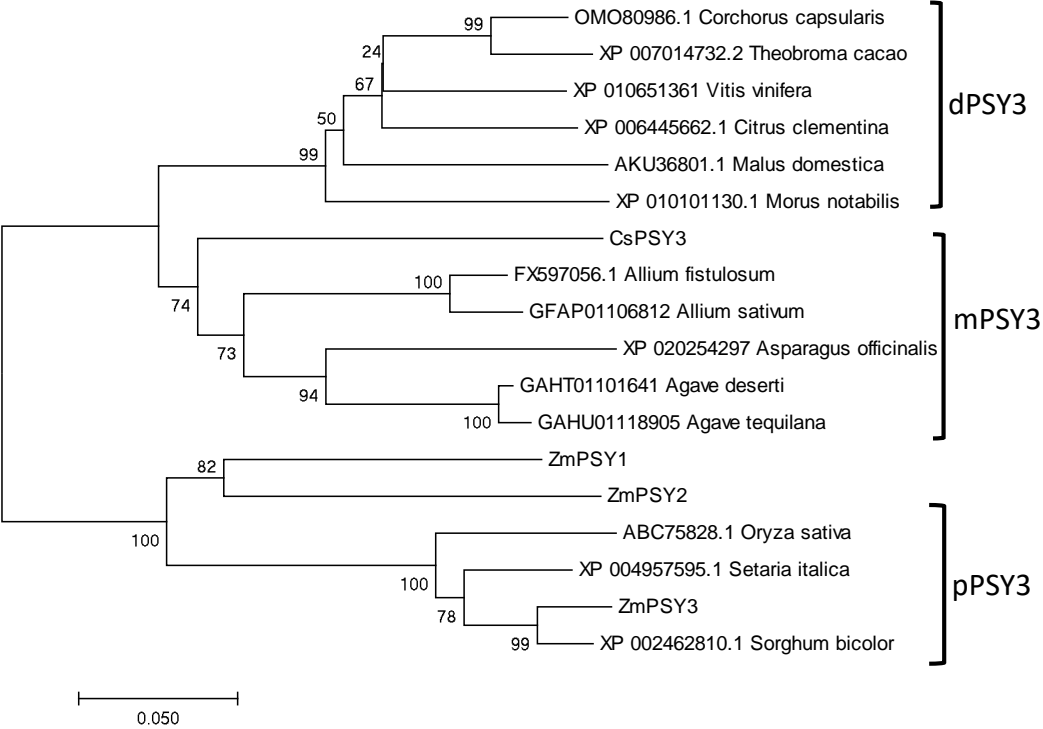

**Supplementary Figure S2.** Phylogenetic tree (neighbor-joining) of PSY3 enzymes from monocots (excluding the Poaceae sequences: mPSY3), Poaceae sequences (pPSY3) and dicots (dPSY3). The length of branch expresses evolutionary distance, with its scale being 0.05.

Supplementary Figure S3

*CsPSY1b* 5'UTR

AGAAATAATAGTAATAAAAAATTTGCATTATTTTATCTTCTAAGAAAATGATTGGTGATTTTTTTTTTCTC  
TTTGTTTTTTGGGAGAGAGGTGGTTGATTCTATACCTAGCATGCCATGGTTCTCATGCTAGGAATTCAAT  
GGTATATAATGGTGTGGTAGTGGTTGATAGTCATTCATCACATGCTATTTGGAAACACAAAGATAAGAGA  
TACCCAATTCCACCACTTAACTTGCCCCTCTCTTCTTCTTCTTCTTCTTCTTCTTCTTCAAAGTTCATTC  
ACTTCTTTTGGGGGCATCTTGTCAATTATTGAATACTGAAGGTAACATACTATTCATATCATATTCCTTTT  
TGGTATCTTAGCATTGTTCTTTTTTAATGTATGTCCATTTTCATCCAAGTGGCTCTACTTTTTCTCTTGA  
ATGCTAATAACACCATACTATTCCTAGGATAATTTTGGCATGTGGGTCTTGGTTGTTATGATTATTGTCT  
AGCTTTTGTTGGTATATCTCCACTTCTTCTCTTTTTTGTTTTTTGTAAGAGTAGAAAAAAGGAACCTCC  
TTTTTTCTCTCCCTTCATCATGTCAATTGTTGATTGGATACTAAAGATGACACTTTTCCTCTTTTCTTGGT  
ATGGATTTACCAAGTCATCTAAGTTTTTCAATATTGAGCAATGAATCTGAATATCTGTTATAAATACCC  
ATCAGAAGTTCCTCTCCTTTGTGTTTCAATCATGTCACTGTTGATTGGATACTGAAAAGTAACATCTTGA  
AGAATTTTAGCATATGGGTTTGTGATAGTTTATGATTACCTTGTGATTCATGTAGTTAATTTACTTACAA  
TACTCTACTTCTTTAGAGTTGTAATCACAAGGATTTGAAACTCTGCTGGAATG

**Supplementary Figure S3.** *CsPSY1b* 5'UTRs with the intronic sequence in white background, and the start codón in red.

Supplementary Figure S4

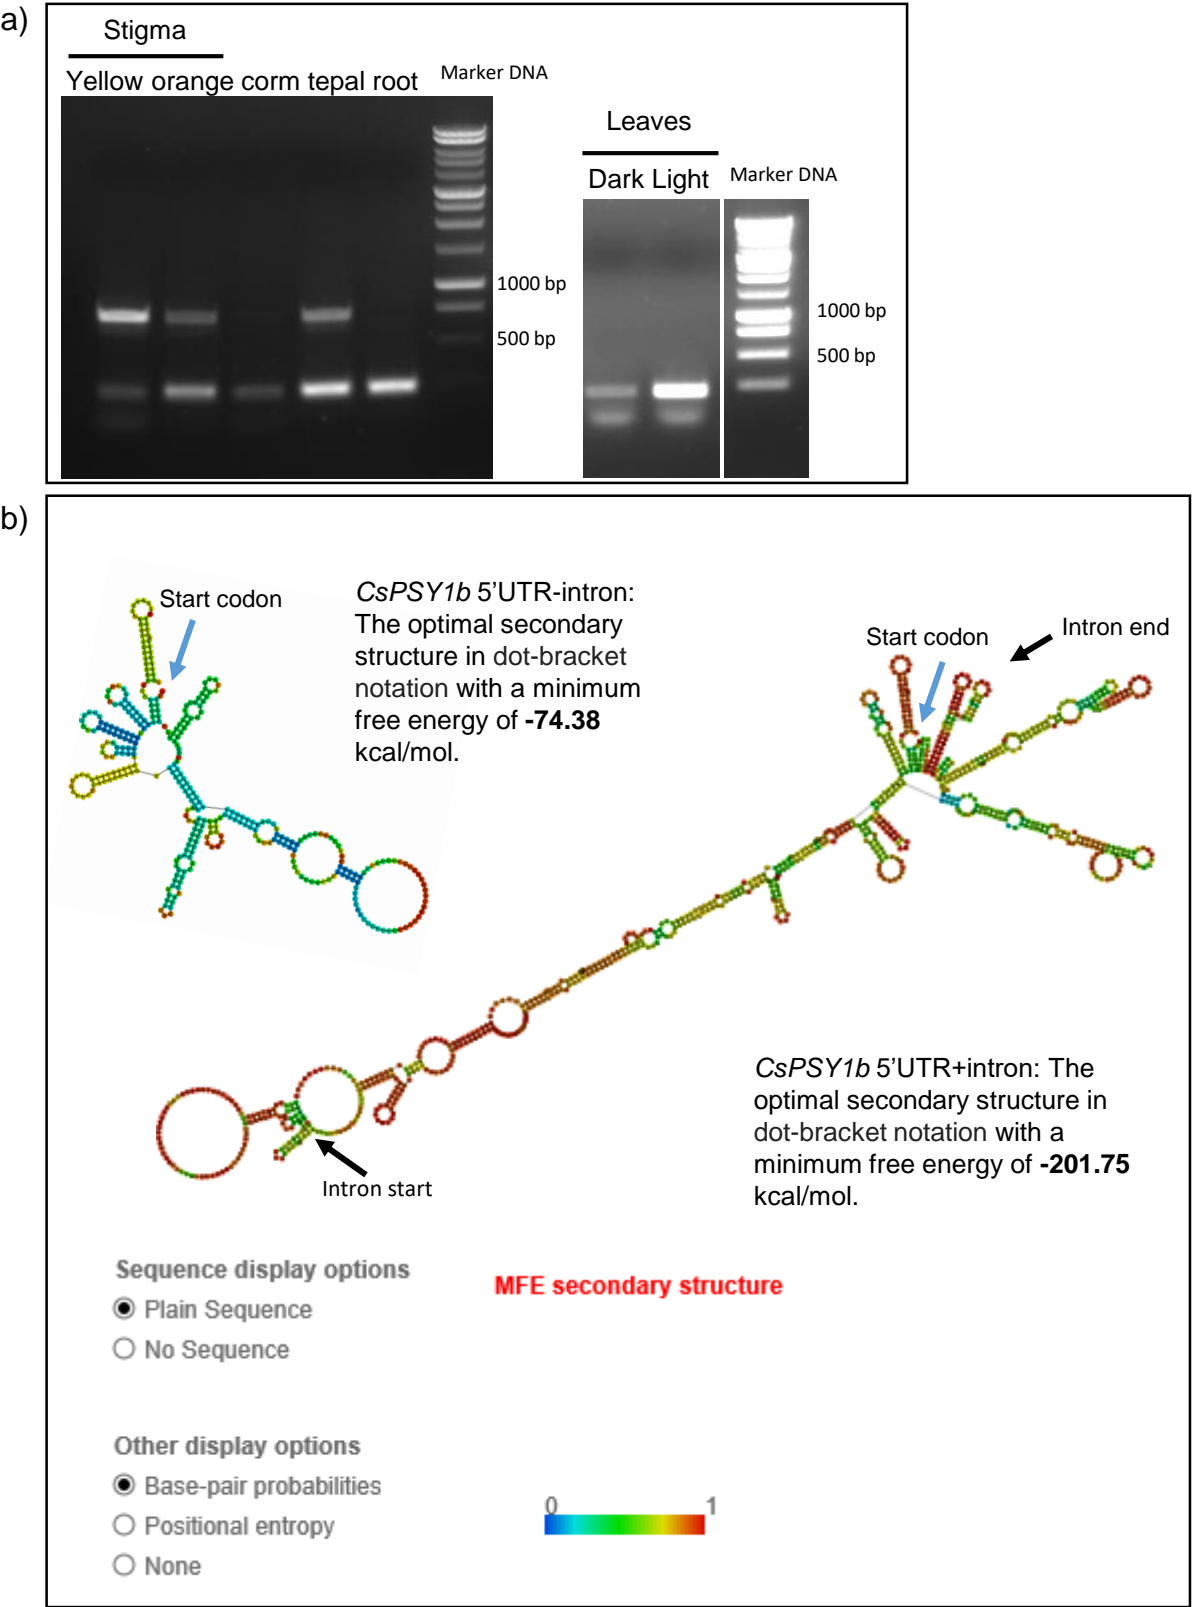

**Supplementary Figure S4.** Selective expression of alternative *CsPSY1b* variants. (a) Agarose gel showing the results of RT-PCR over *CsPSY1a* 5'UTR. (b) Structures of *PSY* 5'UTRs with or without the intron sequence performed with RNAalifold .

Supplementary Figure S5

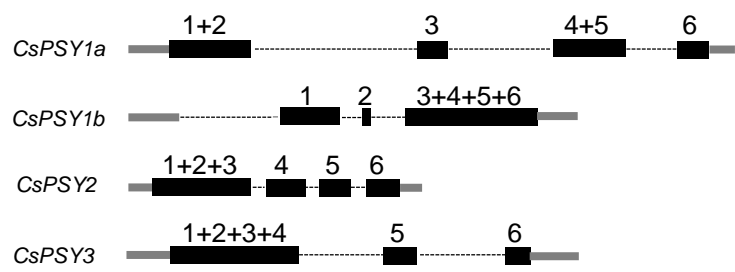

**Supplementary Figure S5.** Exon/intron structure of genomic *CsPSY* genes. Identified exons are shown as solid black blocks. Introns are shown as dotted lines and untranslated regions are shown as grey lines.

Supplementary Figure S6

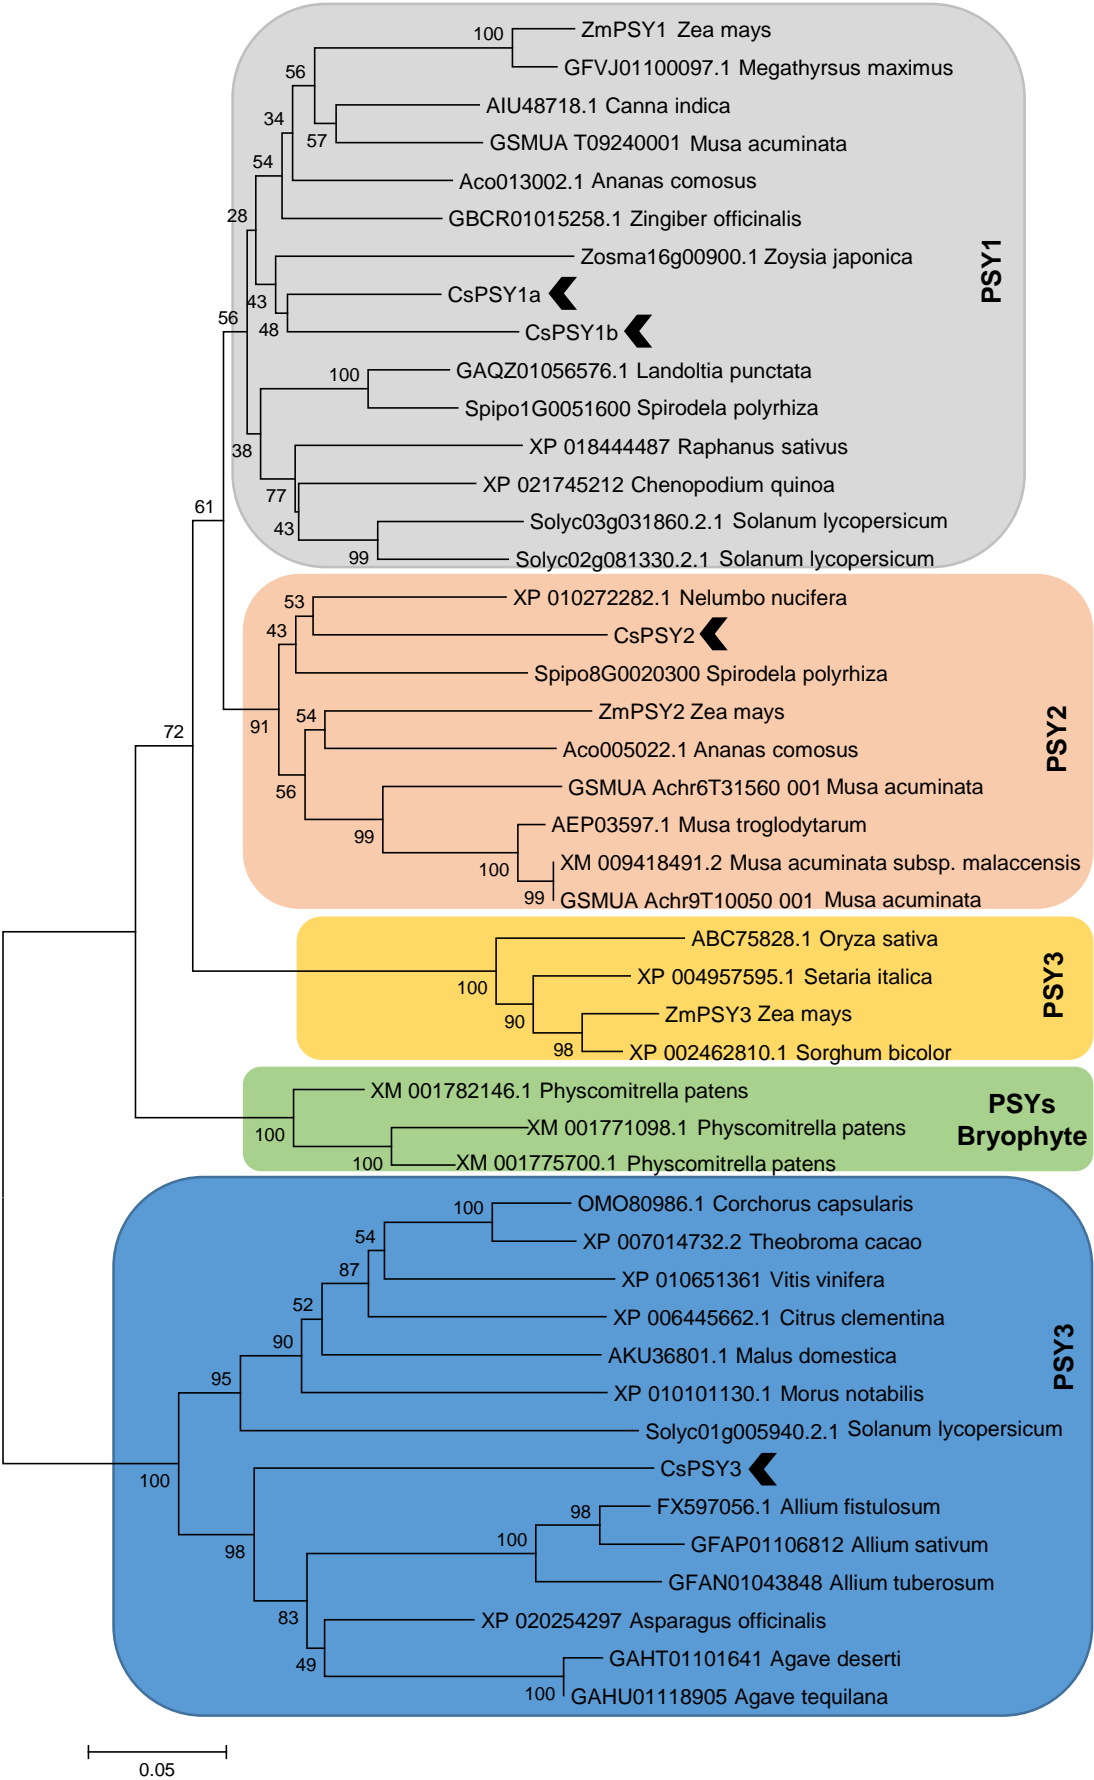

**Supplementary Figure S6.** Phylogenetic tree (neighbor-joining) of PSY enzymes. Indicated by a black arrow are CsPSY enzymes isolated in this study. Numbers associated with the branches are the neighbor-joining bootstrap values. The length of branch expresses evolutionary distance, with its scale being 0.05.

Supplemental Table S1. Oligonucleotide sequences used in this study.

|                                         | Forward 5'-3'                                          | Reverse 5'-3'                                 |
|-----------------------------------------|--------------------------------------------------------|-----------------------------------------------|
| For cDNAS isolation                     | 1-GARTAYGCIAARACITTYTAYYT<br>2-ATHTGGGCIATNTAYGTITGGTG | TCRTCYTGGIGGIAGRTADATYCT                      |
| For RACE-PCR                            |                                                        |                                               |
| CsPSY-1a                                | GTGTTCCGGTGATGGGTATCG                                  | CTTGAATGGCTGAATGTCAAC                         |
| CsPSY-1b                                | TGCACCAGACTCTCAAGCCAC                                  | GTCCATCTACAAGCTCATCTGT                        |
| CsPSY-2                                 | TCAGCTTACCAACATACTAAGA                                 | CATCCACAAGTTCATCGGTTC                         |
| CsPSY-3                                 | AGGCATGCAACTACCAACATC                                  | TCTTGCCATCGATCAAGGACA                         |
| For full-length cDNA and gDNA isolation |                                                        |                                               |
| CsPSY-1a                                | ATGGCAATCGCATTACTTCGAGT                                | TCATCCTTTCAAGAGGCTCGACT                       |
| CsPSY-1b                                | ATGGCAACTCAAATGATGAGGGT                                | CTAGGCATTACCAGGTTGGCTAC                       |
| CsPSY-2                                 | ATGTCTGGTTCGTGTGTTTTGTTG                               | TCAGACTTTTGAAGGACCAAATG                       |
| CsPSY-3                                 | ATGAGTACCTCCATTTTACCAAAT                               | AGCTTTAGCAAATCCCCAAGGCA                       |
| For expression analyses                 |                                                        |                                               |
| CsPSY-1a                                | TTCGCCCATAGAATTTCCAA                                   | TAAACCCTCTGCTCCGAAGA                          |
| CsPSY-1b                                | GTTGTCTCACCGGTGGAAGT                                   | TCACCAATTCGAGGTTGACA                          |
| CsPSY-2                                 | TTTCGGTCACCACCGATAAG                                   | TCATGAGCAATGTTCCCAAG                          |
| CsPSY-3                                 | CACTATCCAGCTTCCCTCCA                                   | CCACGACACCTCCTATAGCC                          |
| For activity assays                     |                                                        |                                               |
| CsPSY-1a                                | CGCCCTTGGCGAATTCTGAAGGAGACCTTAG<br>AGGA                | TACCCTCGAGGAATTCTCATCCTTTCAAG<br>AGGCTC       |
| CsPSY-1b                                | CGCCCTTGGCGAATTCTGCAACCCGGTGAA<br>AGAT                 | TACCCTCGAGGAATTCTCATTACCAGGTT<br>GGCTAC       |
| CsPSY-2                                 | CGCCCTTGGCGAATTCCATCACTTCACTGG<br>AAGG                 | TACCCTCGAGGAATTCTCAGACTTTTGAA<br>GGACCA       |
| CsPSY-3                                 | CGCCCTTGGCGAATTCTGTGAACGAGGTCGT<br>GGTA                | TACCCTCGAGGAATTCTCAAGCAAATCCC<br>CAAGGCA      |
| For GFP fusion                          |                                                        |                                               |
| CsPSY-1a                                | GGACTCTTGACCATGGATGGCAATCGCATT<br>ACTTCGAGT            | GTCAGATCTACCATGGTCCTTTCAAGAGG<br>CTCGACTGCC   |
| CsPSY-1b                                | GGACTCTTGACCATGGATGGCAACTCAAAT<br>GATGAGGGT            | GTCAGATCTACCATGCGGGCATTACCTTG<br>GCTACCTTGC   |
| CsPSY-2                                 | GGACTCTTGACCATGATGTCTGGTTCTGTT<br>GTTTTGTTGATTTC       | GTCAGATCTACCATGCCGACTTTTGAAGG<br>ACCAGCAAGAGC |
| CsPSY-3                                 | GGACTCTTGACCATGATGAGTACCTCCATT<br>TTACCAAATCTCTCTATG   | GTCAGATCTACCATGAGCTTTAGCAAATC<br>CCCAAGGC     |
| For 5'UTR CsPSY1b analyses              | AGTGGTTGATAGTCATTCATC                                  | GACAACCCTCATCATTTGAGT                         |

Supplemental Table S2. Characteristics of the PSY proteins from saffron.

| Name    | Accession number | cDNA size (bp) | Protein size (aa) | Mw (KDa) | PI   |
|---------|------------------|----------------|-------------------|----------|------|
| CsPSY1a | MH124237         | 1272           | 423               | 47.79    | 8.66 |
| CsPSY1b | MH124238         | 1187           | 395               | 44.24    | 8.86 |
| CsPSY2  | MH124239         | 1209           | 388               | 43.97    | 9.92 |
| CsPSY3  | MH124240         | 1098           | 366               | 42.53    | 6.28 |



Supplemental Table S3. Characteristics of the saffron PSY genomic clones

|         | Intron number | Intron size         | 5'UTR   | 3'UTR |
|---------|---------------|---------------------|---------|-------|
| CsPSY1a | 3             | 958/619/316         | 307     | 149   |
| CsPSY1b | 3             | 536 (5'UTR)/143/256 | 890     | 235   |
| CsPSY2  | 3             | 73/90/89            | 167/107 | 103   |
| CsPSY3  | 2             | 524/539             | 264     | 293   |

Supplemental Table S4. Mass pair (m/z) and compound-dependent parameters of the standards.  
† C.E.: Collision Energy

| Compound name | t <sub>R</sub> (min) | Quantifier ion (m/z) |                |                        | Qualifier ion (m/z) |                |                        |
|---------------|----------------------|----------------------|----------------|------------------------|---------------------|----------------|------------------------|
|               |                      | Q1 Precursor ion     | Q3 Product ion | C.E. <sup>†</sup> (eV) | Q1 Precursor ion    | Q3 Product ion | C.E. <sup>†</sup> (eV) |
| (±)-GR24 (IS) | 3.47                 | 321                  | 224            | 11                     | -                   | -              | -                      |
| Orobanchol    | 3.67                 | 347                  | 233            | 12                     | 347                 | 329            | 6                      |
